# Supplementary material for: Familial Transmission of emm12 Group A Streptococcus
Source: PubMed Central journal article supplement (PMC5621563; doi:10.3201/eid2310.170343), 2017-10
Supplement: 17-0343-Techapp-s1.pdf [file 17-0343-Techapp-s1.pdf]

# Familial Transmission of *emm12* Group A *Streptococcus*

## Technical Appendix

Table 1. Antimicrobial susceptibility test results of *emm12* Group A *Streptococcus pyogenes* spread by familial transmission\*†

| Antimicrobial drug | Antimicrobial susceptibility testing (disk diffusion method)‡ |                |
|--------------------|---------------------------------------------------------------|----------------|
|                    | Case-patient 1                                                | Case-patient 2 |
| Penicillin G       | S                                                             | S              |
| Ampicillin         | S                                                             | S              |
| Amoxicillin        | S                                                             | S              |
| Cefotaxime         | S                                                             | S              |
| Gentamicin         | I                                                             | I              |
| Tetracycline       | S                                                             | S              |
| Levofloxacin       | S                                                             | S              |
| Erythromycin       | S                                                             | S              |
| Lincomycin         | S                                                             | S              |
| Pristinamycin      | S                                                             | S              |
| Linezolid          | S                                                             | S              |
| Teicoplanin        | S                                                             | S              |
| Vancomycin         | S                                                             | S              |
| Nitrofurantoin     | S                                                             | S              |
| Rifampin           | S                                                             | S              |

\*S, susceptible; I, intermediate categorization.

†The 2 strains of *Streptococcus pyogenes* were identified by the hospital laboratories and by the Centre National de Référence des Streptocoques using mass spectrometry.

‡Antimicrobial susceptibility testing and genotyping of the 2 strains were performed simultaneously by the Centre National de Référence des Streptocoques.

Table 2. Strain analysis of *emm12* Group A *Streptococcus pyogenes* spread by familial transmission

| Specimen*   | Toxins and superantigens genotyping |                                |
|-------------|-------------------------------------|--------------------------------|
|             | Case-patient 1<br><i>emm12</i>      | Case-patient 2<br><i>emm12</i> |
| <i>SpeA</i> | Negative                            | Negative                       |
| <i>SpeB</i> | Positive                            | Positive                       |
| <i>SpeC</i> | Positive                            | Positive                       |
| <i>SsA</i>  | Negative                            | Negative                       |
| <i>Sic</i>  | Negative                            | Negative                       |
| <i>Smez</i> | Positive                            | Positive                       |

\*Protein M genotyping (sequencing of the N terminus variable region of the *emm* gene).
